# Supplementary material for: Study on the changes of FABP4 and PPARγ levels in knee tissues of patients with osteoarthritis
Source: Research Square preprint supplement (doi:10.21203/rs.3.rs-6446806/v1), 2025-05-07

**cartilage-GAPDH-merge**

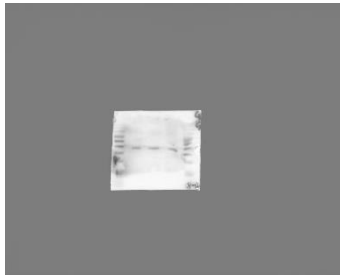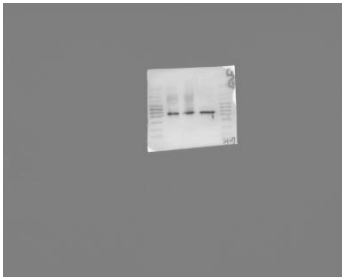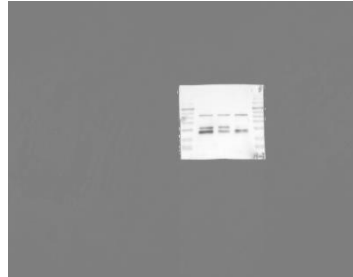

**cartilage-PPAR merge**

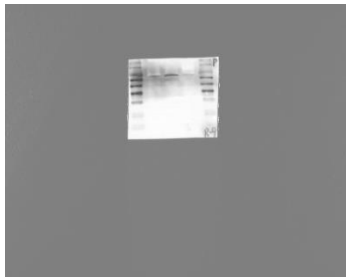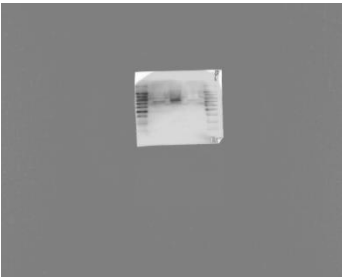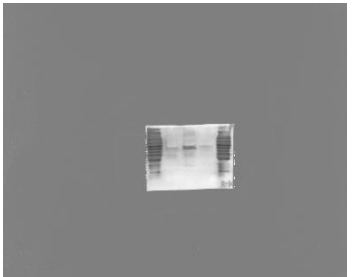

**cartilage-FABP4 merge**

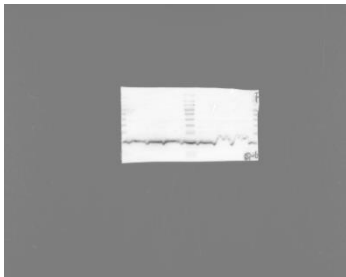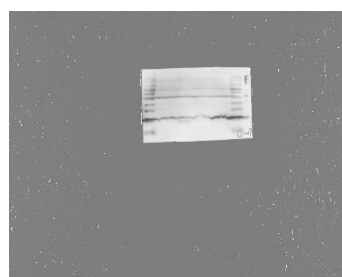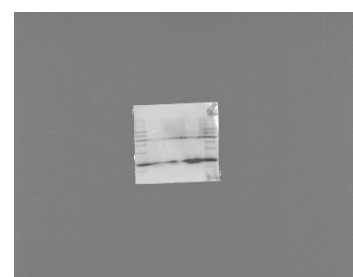

Synovium- GAPDH merger

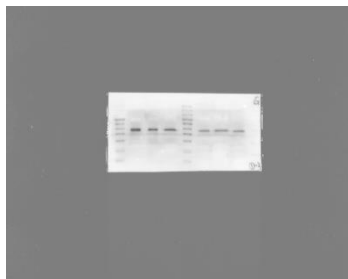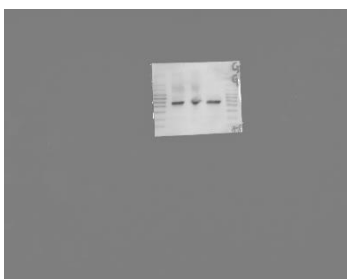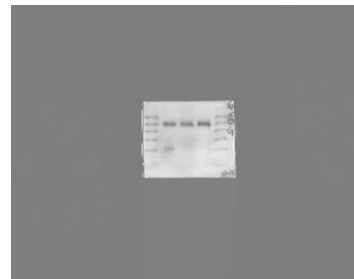

Synovium- FABP4 merger

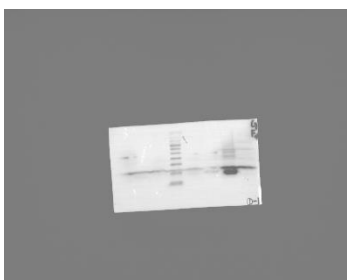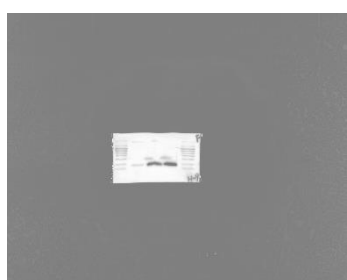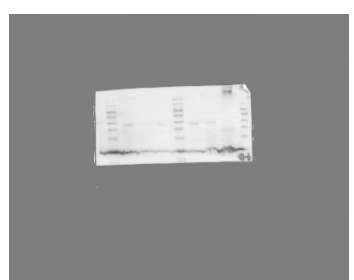

Synovium- PPAR merger

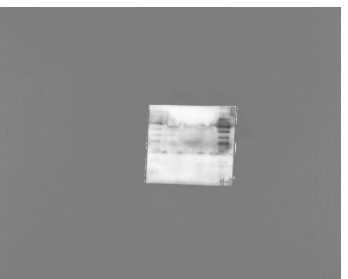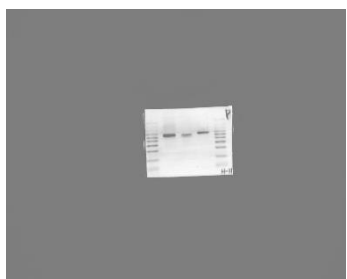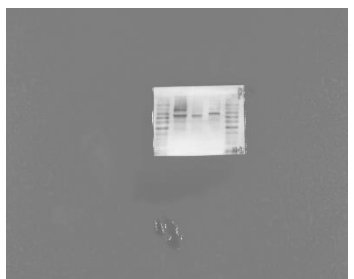

Synovium-cleaved-Caspase3 merger

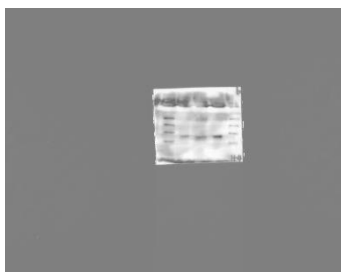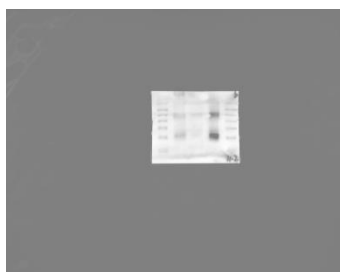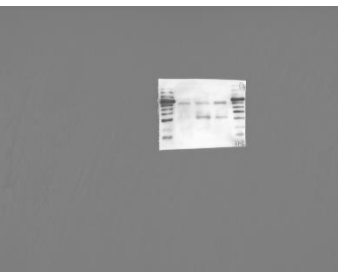

### Synovium-BCL2 merger

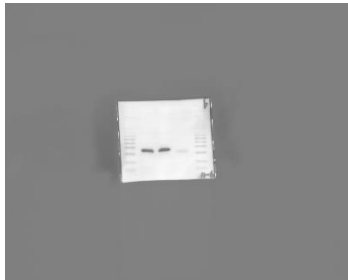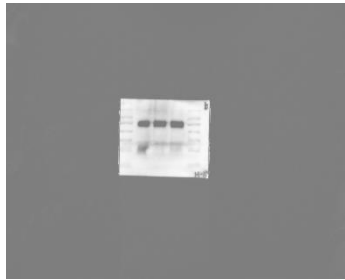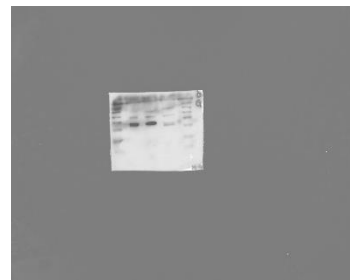

### Synovium-BAX merger

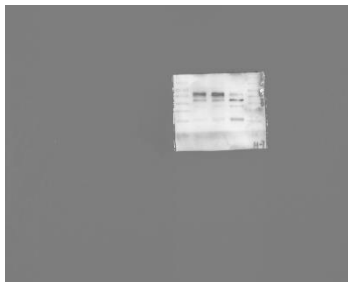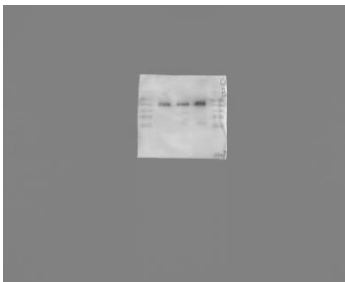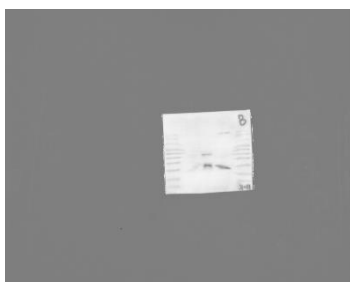

Supplement: Supplementary file 1 [file 6670d1bd8ef5df3058d76bec.pdf]
